# Supplementary material
Source: PubMed Central journal article supplement (PMC5818310)
Supplement: NIHMS917226-supplement-supplement_1.pdf [file NIHMS917226-supplement-supplement_1.pdf]

**TABLE LEGENDS:**

**Table 1:** Patient, tumor, and treatment characteristics overall and in patients with and without prior hepatic resection

**Table 2:** Univariate and multivariate analyses for local tumor progression-free survival

**FIGURE LEGENDS:**

**Figure 1:** Flowchart diagram of patient selection and exclusion criteria.

**Figure 2:** Local tumor progression rates per patient and per lesion in patients with and without prior hepatic resection.

**Figure 3:** Kaplan-Meier curves for (A) local tumor progression-free survival ( $P < 0.001$ ), (B) recurrence-free survival (freedom from recurrence at any site) ( $P = 0.026$ ), and (C) overall survival ( $P = 0.003$ ) in patients with (blue line) and without (red line) prior hepatic resection.

**Supplementary Figure 1:** Kaplan-Meier curves for local tumor progression-free survival through per each ablated lesion analysis ( $P < 0.001$ ).

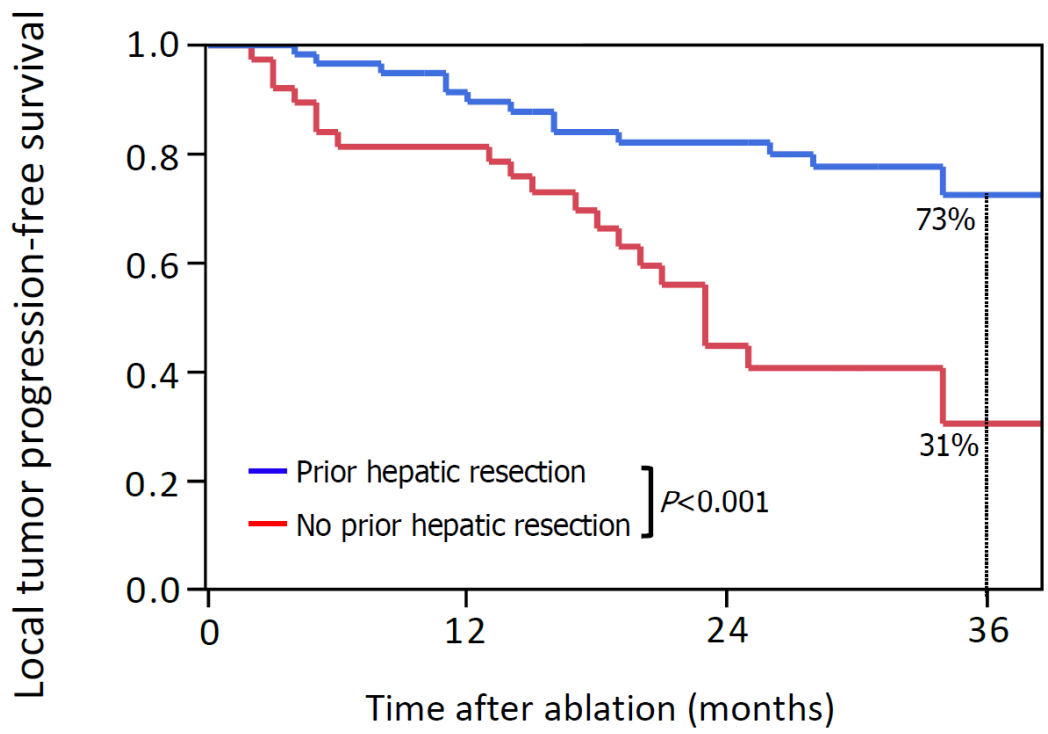

| Patients at risk           |    |    |    |    |
|----------------------------|----|----|----|----|
| Prior hepatic resection    | 59 | 52 | 40 | 28 |
| No prior hepatic resection | 38 | 31 | 12 | 8  |
